# Supplementary material for: An improved north–south synchronization of ice core records around the 41 kyr 10 Be peak
Source: Copernicus journal article supplement (doi:10.5194/cp-13-217-2017), 2017-03-10
Supplement: Supplementary file 1 [file Data_Laschamp_CP.xlsx]

## Sheet: README
High-resolution 10Be concentrations in the NGRIP, EDC, EDML and Vostok ice cores and high-resolution dD data in Vostok (5G) during the Laschamp excursion
References:
For the EDC 10Be data, please cite Raisbeck et al., 2007:
Raisbeck, G. M., Yiou, F., Jouzel, J., and Stocker, T. F.:
Direct north-south synchronization of abrupt climate change record in ice cores using Beryllium 10
Clim. Past, 3, 541-547, doi:10.5194/cp-3-541-2007, 2007.
For the NGRIP, EDML and Vostok, please cite this paper:
Raisbeck, G. M., Cauquoin, A., Jouzel, J., Landais, A., Petit, J.-R., Lipenkov, V. Y., Beer, J., Synal, H.-A., Oerter, H., Johnsen, S. J., Steffensen, J. P., Svensson, A., and Yiou, F.:
An improved North-South synchronization of ice core records around the 41 kyr beryllium-10 peak
Clim. Past, This issue, 2016.

## Sheet: NGRIP
Depth (m)	Be-10 (10^3 at/g)
bottom of sample
2102.21	67.7
2102.32	53.2
2102.43	113
2102.54	62.5
2102.65	77
2102.76	76.7
2102.87	70.1
2102.98	43.5
2103.09	78.3
2103.2	84.3
2103.31	64.2
2103.42	53
2103.53	77.5
2103.64	75.6
2103.75	92.3
2103.86	91.5
2103.97	79.5
2104.08	66.6
2104.19	69.8
2104.3	61.8
2104.41	69.8
2104.52	62.9
2104.63	76.9
2104.74	80.1
2104.85	79.2
2104.96	69.1
2105.07	67.6
2105.18	61.9
2105.29	57.4
2105.4	48.9
2105.51	127
2105.62	76.3
2105.73	55.9
2105.84	114
2105.95	83.3
2106.06	116
2106.17	119
2106.28	68.3
2106.39	94.6
2106.5	82.5
2106.61	65.5
2106.72	67.7
2106.83	79.9
2106.94	73.7
2107.05	91.9
2107.16	95.3
2107.27	58
2107.38	80.9
2107.49	94.5
2107.6	57.5
2107.71	72.7
2107.82	55.7
2107.93	75.7
2108.04	49.4
2108.15	56.3
2108.26	88.2
2108.37	62.9
2108.48
2108.59	67.6
2108.7	61
2108.81	57.5
2108.92	89.1
2109.03	75.7
2109.14	100
2109.25	96.4
2109.36	98.6
2109.47	97.7
2109.58	107
2109.69	145
2109.8	98.4
2109.91	80.6
2110.02	78.7
2110.13	103
2110.24	85.8
2110.35	66.8
2110.46	121
2110.57	74.8
2110.68	68.1
2110.79	71.9
2110.9	63.2
2111.01	52
2111.12	79.1
2111.23	51.2
2111.34	49.7
2111.45	56
2111.56	59.3
2111.67	86.1
2111.78	61.7
2111.89	76.7
2112	79.2
2112.11	97.1
2112.22	116
2112.33	86.8
2112.44	71.4
2112.55	72.8
2112.66	72.7
2112.77	65.6
2112.88	80
2112.99	62.7
2113.1	83.7
2113.21	73.6
2113.32	70.7
2113.43	89.4
2113.54	73.2
2113.65	86.3
2113.76	58.3
2113.87	62.8
2113.98	43.4
2114.09	50.8
2114.2	42.8
2114.31	49.7
2114.42	51.8
2114.53	39.9
2114.64	55.1
2114.75	54.6
2114.86	54.3
2114.97	56.4
2115.08	43
2115.19	36
2115.3	33
2115.41	31.1
2115.52	50.5
2115.63	37
2115.74	46.6
2115.85	33.7
2115.96	41.3
2116.07	65.7
2116.18	58.8
2116.29	48.3
2116.4	59.3
2116.51	49.3
2116.62	58.2
2116.73	77.5
2116.84	75.3
2116.95	59.3
2117.06	45.1
2117.17	51.7
2117.28	62.2
2117.39	44.1
2117.5	53.4
2117.61	80.6
2117.72	50.6
2117.83	68.1
2117.94	46.8
2118.05	33.9
2118.16	29
2118.27	45.7
2118.38	42.3
2118.49	32.1
2118.6	51
2118.71	62
2118.82	67
2118.93	75.3
2119.04	56.9
2119.15	58.5
2119.26
2119.37	85.7
2119.48	56.3
2119.59	62.9
2119.7	44.7
2119.81	48.9
2119.92	41.6
2120.03	49.9
2120.14	39
2120.25	44.8
2120.36	47.5
2120.47	35.6
2120.58	48.1
2120.69	39
2120.8	49.3
2120.91	46.4
2121.02	52
2121.13	69.3
2121.24	63.5
2121.35	40
2121.46
2121.57
2121.68
2121.79
2121.9
2122.01
2122.12
2122.23
2122.34
2122.45
2122.56	34.6
2122.67	37.8
2122.78	42.6
2122.89	46.2
2123	45
2123.11	49.4
2123.22	33.9
2123.33	43
2123.44	51
2123.55	50.6
2123.66	48.5
2123.77	54.2
2123.88	68.7
2123.99	47.7
2124.1	38.4
2124.21	53.8
2124.32	55.3
2124.43	73.2
2124.54	66.5
2124.65	76.6
2124.76	66.9
2124.87	81.7
2124.98	71
2125.09	66.3
2125.2	68.3
2125.31	57
2125.42	113
2125.53	109
2125.64	114
2125.75	57.3
2125.86	73.6
2125.97	120
2126.08	80
2126.19	73.7
2126.3	79.9
2126.41	67.5
2126.52	123
2126.63	81.4
2126.74	111
2126.85	83.5
2126.96	83.5
2127.07
2127.18	116
2127.29	80.8
2127.4	140
2127.51	95.3
2127.62	99.6
2127.73	115
2127.84	91.1
2127.95	87.5
2128.06	79.2
2128.17	94
2128.28	77.4
2128.39	122
2128.5	72.8
2128.61	71.6
2128.72	97.9
2128.83	103
2128.94	73
2129.05	82.2
2129.16	71.5
2129.27	68.5
2129.38	67
2129.49	86.7
2129.6	61.7
2129.71	49.5
2129.82	49.7
2129.93	48.1
2130.04	66.3
2130.15	56.1
2130.26	79.9
2130.37	95.2
2130.48	104
2130.59	88.7
2130.7	72.2
2130.81	70.7
2130.92	89.1
2131.03	107
2131.14	94.4
2131.25	76.9
2131.36	114
2131.47	69.9
2131.58	80.9
2131.69	71.3
2131.8	62.3
2131.91	74.9
2132.02	74.9
2132.13	66.1
2132.24	75.2
2132.35	67.8
2132.46	78.1
2132.57	70.8
2132.68	84
2132.79	93.9
2132.9	63.6
2133.01	68.6
2133.12	51.8
2133.23	52
2133.34	72
2133.45	44.5
2133.56
2133.67
2133.78
2133.89
2134
2134.11	46
2134.22	61.5
2134.33	71.7
2134.44	40.8
2134.55	75.1
2134.66	47.5
2134.77	40
2134.88	47.1
2134.99	49
2135.1	34.6
2135.21	57.4
2135.32	46.4
2135.43	60.8
2135.54	50.3
2135.65	42.1
2135.76	47.4
2135.87	69.1
2135.98	41
2136.09	42.5
2136.2	47.2
2136.31	39.1
2136.42	35.4
2136.53	30.1
2136.64	52.2
2136.75	50.6
2136.86	54.8
2136.97	54.5
2137.08	41.7
2137.19	48.2
2137.3	38
2137.41	43.2
2137.52	48.5
2137.63	46.8
2137.74	48.8
2137.85	41.8
2137.96
2138.07	34.1
2138.18	27.2
2138.29	42
2138.4	25.2
2138.51	36.7
2138.62	43.5
2138.73	53
2138.84	48.8
2138.95	47.2
2139.06	59.6
2139.17	47.6
2139.28	46.4
2139.39	50.4
2139.5	29.8
2139.61	39.2
2139.72	48.9
2139.83	60.6
2139.94	44.3
2140.05	42.3

## Sheet: EDC
EDC96 Depth (m)	Be-10 (10^3 at/g)
top of sample
698.06	114
698.17	109
698.28	159
698.39	156
698.5	72.1
698.61	117
698.72	122
698.83	126
698.94	133
699.05	123
699.16	130
699.27	134
699.38	145
699.49	133
699.6	133
699.71	133
699.82	146
699.93	120
700.04	133
700.15	117
700.26	110
700.37	122
700.48	89.7
700.59	116
700.7	133
700.81	132
700.92	132
701.03	99.7
701.14	140
701.25	129
701.36	112
701.47	90.1
701.58	108
701.69	90.3
701.8	86.6
701.91	99.6
702.02	100
702.13	128
702.24	86.5
702.35	118
702.46	139
702.57	128
702.68	131
702.79	122
702.9	172
703.01	147
703.12	179
703.23	130
703.34	83.9
703.45	109
703.56	118
703.67	126
703.78	110
703.89	108
704	103
704.11	102
704.22	158
704.33	146
704.44	100
704.55	126
704.66	116
704.77	134
704.88	136
704.99	117
705.1	97.9
705.21	77
705.32	106
705.43	113
705.54	104
705.65	101
705.76	125
705.87	95.8
705.98	119
706.09	148
706.2	130
706.31	166
706.42	143
706.53	134
706.64	135
706.75	124
706.86	119
706.97	116
707.08	119
707.19	116
707.3	138
707.41	158
707.52	129
707.63	157
707.74	176
707.85	153
707.96	162
708.07	196
708.18	164
708.29	152
708.4	142
708.51	122
708.62	108
708.73	134
708.84	117
708.95	89.7
709.06	100
709.17	141
709.28	145
709.39	114
709.5	125
709.61	127
709.72	105
709.83	114
709.94	159
710.05	114
710.16	104
710.27	101
710.38	102
710.49	140
710.6	134
710.71	116
710.82	130
710.93	121
711.04	114
711.15	113
711.26	127
711.37	111
711.48	130
711.59	97.4
711.7	103
711.81	101
711.92	120
712.03	89.4
712.14	122
712.25	164
712.36	153
712.47	154
712.58	147
712.69	184
712.8	127
712.91	130
713.02	127
713.13	143
713.24	142
713.35	95.8
713.46	106
713.57	111
713.68	170
713.79	82.6
713.9	110
714.01	119
714.12	93.5
714.23	125
714.34	105
714.45	105
714.56	110
714.67	111
714.78	127
714.89	117
715	123
715.11	106
715.22	99.1
715.33	124
715.44	116
715.55	94.7
715.66	103
715.77	127
715.88	108
715.99	123
716.1	109
716.21	120
716.32	118
716.43	100
716.54	122
716.65	104
716.76	120
716.87	120
716.98	122
717.09	106
717.2	116
717.31	107
717.42	105
717.53	143
717.64	87.6
717.75	106
717.86	102
717.97	142
718.08	163
718.19	168
718.3	159
718.41	134
718.52	143
718.63	137
718.74	150
718.85	134
718.96	121
719.07	106
719.18	146
719.29	110
719.4	115
719.51	132
719.62	129
719.73	135
719.84	160
719.95	154
720.06	138
720.17	117
720.28	128
720.39	135
720.5	166
720.61	131
720.72	153
720.83	135
720.94	135
721.05	104
721.16	121
721.27	105
721.38	120
721.49	144
721.6	129
721.71	158
721.82	186
721.93	200
722.04	187
722.15	159
722.26	182
722.37	177
722.48	204
722.59
722.7	236
722.81	182
722.92	164
723.03	123
723.14	139
723.25	147
723.36	144
723.47	157
723.58	144
723.69	172
723.8	159
723.91	165
724.02	157
724.13	171
724.24	240
724.35	186
724.46	243
724.57	198
724.68	153
724.79	157
724.9	151
725.01	187
725.12	189
725.23	154
725.34	100
725.45	148
725.56	156
725.67	197
725.78	162
725.89	188
726	181
726.11	153
726.22	253
726.33	293
726.44	160
726.55	139
726.66	160
726.77	153
726.88	237
726.99	123
727.1	158
727.21	154
727.32	191
727.43	151
727.54	150
727.65	162
727.76	208
727.87	166
727.98	192
728.09	134
728.2	191
728.31	185
728.42	203
728.53	124
728.64	156
728.75	137
728.86	171
728.97	157
729.08	171
729.19	286
729.3	180
729.41	127
729.52	264
729.63	182
729.74	173
729.85	155
729.96	115
730.07	233
730.18	262
730.29	167
730.4	189
730.51	175
730.62	147
730.73	228
730.84	176
730.95
731.06	189
731.17	162
731.28
731.39	212
731.5	246
731.61	188
731.72	207
731.83	204
731.94	204
732.05	172
732.16	169
732.27	123
732.38	145
732.49	140
732.6	197
732.71	195
732.82	205
732.93	165
733.04	158
733.15	143
733.26	163
733.37	150
733.48	163
733.59	193
733.7	157
733.81	183
733.92	208
734.03	260
734.14	193
734.25	242
734.36	282
734.47	227
734.58	237
734.69	279
734.8	256
734.91	253
735.02	115
735.13	227
735.24	185
735.35	171
735.46	189
735.57	196
735.68	139
735.79	142
735.9	210
736.01	203
736.12	207
736.23	191
736.34	226
736.45	175
736.56	261
736.67	235
736.78	243
736.89	270
737	212
737.11	281
737.22	226
737.33	188
737.44	209
737.55	158
737.66	172
737.77	193
737.88	154
737.99	211
738.1	198
738.21	190
738.32	183
738.43	174
738.54	171
738.65	186
738.76	157
738.87	181
738.98	167
739.09	143
739.2	119
739.31	182
739.42	176
739.53	195
739.64	205
739.75	180
739.86	216
739.97	203
740.08	182
740.19	165
740.3	160
740.41	140
740.52	203
740.63	238
740.74	187
740.85	208
740.96	161
741.07	235
741.18	190
741.29	200
741.4	188
741.51	182
741.62	178
741.73	188
741.84	200
741.95	206
742.06	185
742.17	187
742.28	139
742.39	182
742.5	126
742.61	201
742.72	190
742.83	165
742.94	273
743.05	213
743.16	167
743.27	209
743.38	200
743.49	203
743.6	206
743.71	261
743.82	282
743.93	264
744.04	260
744.15	216
744.26	217
744.37	250
744.48	193
744.59	232
744.7	268
744.81	243
744.92	216
745.03	225
745.14	250
745.25	229
745.36	217
745.47	202
745.58	203
745.69	150
745.8	165
745.91	183
746.02	178
746.13	170
746.24	170
746.35	165
746.46	179
746.57	188
746.68	142
746.79	184
746.9	143
747.01	182
747.12	258
747.23	210
747.34	210
747.45	276
747.56	253
747.67	222
747.78	189
747.89	215
748	245
748.11	212
748.22	201
748.33	271
748.44	137
748.55	162
748.66	159
748.77	199
748.88	209
748.99	164
749.1	184
749.21	225
749.32	265
749.43	160
749.54	129
749.65	160
749.76	137
749.87	156
749.98	173
750.09	137
750.2	175
750.31	135
750.42	163
750.53	168
750.64	164
750.75	196
750.86	187
750.97	139
751.08	206
751.19	147
751.3	157
751.41	121
751.52	147
751.63	147
751.74	155
751.85	190
751.96	195
752.07	103
752.18	220
752.29	66
752.4	155
752.51
752.62	137
752.73	121
752.84	166
752.95	160
753.06	130
753.17	169
753.28	132
753.39	164
753.5	160
753.61	143
753.72	159
753.83	167
753.94	177
754.05	170
754.16	218
754.27	234
754.38	195
754.49	187
754.6	177
754.71	159
754.82	138
754.93	127
755.04	154
755.15	149
755.26	140
755.37	114
755.48	133
755.59	140
755.7	160
755.81	159
755.92	171
756.03	144
756.14	164
756.25	180
756.36	144
756.47	142
756.58	182
756.69	170
756.8	129
756.91	109
757.02	180
757.13	144
757.24	157
757.35	169
757.46	187
757.57	154
757.68	172
757.79	137
757.9	174
758.01	179
758.12	118
758.23	183
758.34	190
758.45	174
758.56	197
758.67	139
758.78	146
758.89	111
759	131
759.11	129
759.22	136
759.33	145
759.44	150
759.55	187
759.66	153
759.77	152
759.88	145
759.99	128
760.1	111
760.21	147
760.32	127
760.43	115
760.54	115
760.65
760.76	111
760.87
760.98	90.9
761.09	89.7
761.2	82.8
761.31	127
761.42	108
761.53	116
761.64	122
761.75	126
761.86	63.3
761.97	94.4
762.08	99.1
762.19	106
762.3	112
762.41	152
762.52	129
762.63	130
762.74	144
762.85	138.1
762.96	156
763.07	155
763.18	144
763.29	129
763.4	156
763.51	105
763.62	120
763.73	125
763.84	105
763.95
764.06	136
764.17	97.9
764.28	119
764.39	133
764.5	116
764.61	122
764.72	86.7
764.83	105
764.94	117
765.05	140
765.16	152
765.27	120
765.38	110
765.49	118
765.6
765.71	124
765.82	108
765.93	128
766.04	111
766.15	107
766.26	99.3
766.37	108
766.48	108
766.59	112
766.7	121
766.81
766.92	96
767.03	114
767.14	108
767.25	85
767.36	102
767.47	116
767.58	87.6
767.69	124
767.8	103
767.91	134
768.02	156
768.13	107
768.24	112
768.35	87.5
768.46	116
768.57	121
768.68	91
768.79	105
768.9	123
769.01	152
769.12	117
769.23	151
769.34	126
769.45	121
769.56	114
769.67	112
769.78	153
769.89	111
770	118
770.11	116
770.22	113
770.33	122
770.44
770.55	96.3
770.66	119
770.77	123
770.88	112
770.99	114
771.1	104
771.21	128
771.32	128
771.43	107
771.54	134
771.65	125
771.76	115
771.87	140
771.98	131
772.09	139
772.2	145
772.31	124
772.42	127
772.53	119
772.64	99.5
772.75	100
772.86	123
772.97	118
773.08	101
773.19	123
773.3	131
773.41	117
773.52
773.63	149
773.74	125
773.85	117
773.96	112
774.07	128
774.18	137
774.29	96.8
774.4	138
774.51	146
774.62	145
774.73	147
774.84	116
774.95	125
775.06	124
775.17	123
775.28	122
775.39	138
775.5	118
775.61	132
775.72	123
775.83	122
775.94	124
776.05	103
776.16	133
776.27	156
776.38	124
776.49	145
776.6	131
776.71	113
776.82	125
776.93	133
777.04	170
777.15	149
777.26	123
777.37	115
777.48	135
777.59	113
777.7
777.81	104
777.92	116
778.03	96.5
778.14	147
778.25	152
778.36	130
778.47	140
778.58	110
778.69	142
778.8	132
778.91	129
779.02	152
779.13	115
779.24	109
779.35	116
779.46	126
779.57	117
779.68	115
779.79	123
779.9	118
780.01	109
780.12	145
780.23	137
780.34	117
780.45	124
780.56	146
780.67	115
780.78	135
780.89	108
781	147
781.11	110
781.22	87.6
781.33	105
781.44	122
781.55	110
781.66	105
781.77	102
781.88	150
781.99	166
782.1	121
782.21	123
782.32	127
782.43	117
782.54	132
782.65	143
782.76	128
782.87	153
782.98	98
783.09	91
783.2	101
783.31	107
783.42	105
783.53	103
783.64	110
783.75	130
783.86	105
783.97	107
784.08	123
784.19	133
784.3	103
784.41	111
784.52	137
784.63	147
784.74	134
784.85	136
784.96	106
785.07	97
785.18	97
785.29	71.4
785.4	111
785.51	144
785.62	112
785.73	91.8
785.84	117
785.95	120
786.06	124
786.17	111
786.28	119
786.39	101
786.5	105
786.61	81.9
786.72	145
786.83	115
786.94	104
787.05	103
787.16	147
787.27	96.5
787.38	110
787.49
787.6	66

## Sheet: EDML
Depth (m)	Be-10 (10^3 at/g)
top of sample
1354.38	126.2
1354.62	108.5
1354.88	92.02
1355.12	114.6
1355.38	105.1
1355.62	112.6
1355.88	103.1
1356.12	82.85
1356.38	117.4
1356.62	121.5
1356.88	100.6
1357.12	93.64
1357.38	112.2
1357.62
1357.88	115.4
1358.12	149.8
1358.38	97.28
1358.62	108.5
1358.88	104.9
1359.12	90.7
1359.38	119.5
1359.62	141.5
1359.88
1360.12	120.1
1360.38	115.4
1360.62	154.4
1360.88	120.1
1361.12	128.4
1361.38	96.22
1361.62	140.4
1361.88	152.8
1362.12	134.3
1362.38	157
1362.62	153.4
1362.88	118
1363.12	106.9
1363.38	122.9
1363.62	119.3
1363.88	145.4
1364.12	100.4
1364.38	119.5
1364.62	114.7
1364.88	92.26
1365.12	115.8
1365.38	120.8
1365.62	139.2
1365.88	124.4
1366.12	150.5
1366.38	143.2
1366.62	153.6
1366.88	156.2
1367.12	171.7
1367.38	187.1
1367.62	151.1
1367.88	140
1368.12	94.15
1368.38	120.4
1368.62	123.7
1368.88	107.7
1369.12	134.4
1369.38	119.2
1369.62	154.3
1369.88	126.7
1370.12	135.9
1370.38	127.2
1370.62	174.8
1370.88	166.6
1371.12	114.4
1371.38	113.7
1371.62	120.7
1371.88	107
1372.12	121.6
1372.38	113.4
1372.62	137.6
1372.88
1373.12	126.9
1373.38	143.9
1373.62	140.3
1373.88	112.2
1374.12	118.3
1374.38	102.9
1374.62	118.8
1374.88	141.3
1375.12	166.1
1375.38	144.3
1375.62	119.8
1375.88	100.1
1376.12	134.8
1376.38	163.4
1376.62	140.6
1376.88	143.8
1377.12	143.2
1377.38	121.5
1377.62	109.4
1377.88	137.8
1378.12	120.8
1378.38	113.4
1378.62	120.1
1378.88	118.9
1379.12	114.6
1379.38	112.5
1379.62	113.5
1379.88	94.09
1380.12	154.9
1380.38	125.6
1380.62	111.4
1380.88	147.5
1381.12	141.6
1381.38	132.9
1381.62	137.1
1381.88	159.5
1382.12	138.9
1382.38	166.4
1382.62	156.8
1382.88	153.4
1383.12	136.3
1383.38	146.5
1383.62	167.8
1383.88	142.6
1384.12	148.2
1384.38	128.8
1384.62	117.2
1384.88	104.4
1385.12	121.7
1385.38	125.8
1385.62	147.2
1385.88	124.6
1386.12	106.4
1386.38	107.8
1386.62	131.7
1386.88	108.3
1387.12	112.5
1387.38	131.4
1387.62	168.6
1387.88	138.6
1388.12	151.5
1388.38	140.4
1388.62	178.9
1388.88	119.5
1389.12	124.8
1389.38	112.9
1389.62	104.7
1389.88	104.7
1390.12	120.6
1390.38	160.7
1390.62	156.8
1390.88	115.2
1391.12	101.6
1391.38	110.1
1391.62	95.97
1391.88	103.2
1392.12	98.2
1392.38	113.5
1392.62	109.9
1392.88	94.71
1393.12	118.5
1393.38	90.12
1393.62	98.12
1393.88	88.65
1394.12	97.83
1394.38	115.2
1394.62	94.5
1394.88	81.4
1395.12	110.3
1395.38	126.6
1395.62	106.7
1395.88	96.44
1396.12	81.51
1396.38	90.02
1396.62	87.7

## Sheet: Vostok
5G Depth (m)	Be-10 (10^3 at/g)	dD (‰)
bottom of sample
579.5	301	-464.6
579.6	167	-470.8
579.7
579.8	163	-468.1
579.9	202	-463.2
580	214
580.1	205	-470.5
580.2	182	-470.2
580.3	169	-472.6
580.4	141	-467.4
580.5	214	-471.2
580.6	180	-468.6
580.7	196	-475.3
580.8	159	-472.2
580.9	194	-469.8
581	178	-468.1
581.1	187	-466.8
581.2	263	-472.8
581.3	183	-468.1
581.4	178	-462.5
581.5	173	-465.3
581.6	200	-472.8
581.7	182	-469.6
581.8	181	-468.7
581.9	185	-465.5
582	172	-451
582.1
582.2
582.3
582.4
582.5
582.6
582.7
582.8	241	-466
582.9	158	-457
583	196
583.1	221	-470.4
583.2
583.3	217	-469.5
583.4	214	-463.6
583.5	194	-467
583.6	162	-465.9
583.7	147	-462
583.8	177	-464
583.9	151	-460.6
584	219	-465.7
584.1	182	-466.1
584.2	250	-455.2
584.3	232	-462.6
584.4	159	-466.7
584.5	152	-466.7
584.6	191	-476.9
584.7	201	-475.9
584.8	160	-473.3
584.9	190	-469.5
585	197	-472.6
585.1	216
585.2	142	-460.6
585.3	183	-459
585.4	186	-462.1
585.5	174	-460.9
585.6	179	-466.6
585.7	175	-469.4
585.8	176	-463
585.9	157	-452.8
586	152	-463.3
586.1	151	-462
586.2	161	-459.7
586.3
586.4		-459
586.5	199	-464
586.6	155	-471.3
586.7	166	-473.7
586.8	195	-468.8
586.9	127	-464.2
587	163	-457.5
587.1	188	-464.9
587.2	134	-469.7
587.3	191	-469.8
587.4	189	-469.2
587.5	184	-467.5
587.6	209	-467.8
587.7	166	-469.7
587.8	179	-473
587.9	187	-464
588	175	-469.8
588.1	156	-469.2
588.2	138	-465.2
588.3	201	-471.1
588.4	182	-468.1
588.5	258	-481.8
588.6	274	-475
588.7	177	-459.3
588.8	221	-469.3
588.9	180	-469.8
589	209	-472.5
589.1
589.2
589.3
589.4	211	-473.7
589.5	197	-477.6
589.6	123	-467.2
589.7	174	-468.7
589.8	195	-476.9
589.9	203	-475.2
590	252	-480.3
590.1	243	-480.7
590.2	246	-478.1
590.3	241	-479.3
590.4	258	-483.5
590.5	229	-484.7
590.6	229	-484.3
590.7	186	-477.8
590.8	205	-478.1
590.9	128	-467
591	184	-460.6
591.1
591.2
591.3
591.4
591.5
591.6
591.7
591.8
591.9
592
592.1	244	-477.4
592.2	242	-476.9
592.3	305	-474.5
592.4	263	-471.4
592.5	286	-471.1
592.6	192	-466.1
592.7	222	-472.1
592.8	217	-480.1
592.9	237	-472.2
593	247	-467.8
593.1	302	-476.8
593.2	279	-476
593.3	281	-472
593.4	149	-459.8
593.5	179	-466.4
593.6	183	-469.6
593.7	165	-463.9
593.8	205	-459.3
593.9	237	-475.5
594	262	-479.6
594.1
594.2	253	-485.9
594.3	193	-480.1
594.4	214	-472.7
594.5	208	-477.1
594.6	206	-464.9
594.7	212	-469.6
594.8	286	-470.7
594.9	200	-465.3
595	238	-464.1
595.1	182	-475.9
595.2	184	-473.8
595.3	222	-468.9
595.4	301	-474.3
595.5	247	-475.6
595.6	196	-474.4
595.7	189	-472.8
595.8	189	-469
595.9	243	-472.7
596	304	-479
596.1	193	-478.9
596.2	212	-471.1
596.3	232	-472.8
596.4	357	-482.7
596.5	333	-481
596.6	236	-479.7
596.7	334	-475.8
596.8	302	-475.7
596.9	205	-467.9
597	231	-479.1
597.1	237	-473.3
597.2	216	-471.2
597.3	248	-480.8
597.4	223	-478
597.5	199	-482.6
597.6	295	-480.5
597.7	284	-482.2
597.8	265	-477.4
597.9	270	-478
598	291	-481.4
598.1	234	-469.3
598.2	241	-473.5
598.3	221	-476.1
598.4	334	-473.2
598.5	284	-472.6
598.6	361	-479.2
598.7	247	-478.9
598.8	210	-481.7
598.9	201	-474.4
599
599.1	210	-472.5
599.2	254	-473.9
599.3	265	-465.9
599.4	313	-470.1
599.5	247	-472.2
599.6
599.7
599.8
599.9	218	-471.9
600	234	-472.7
600.1
600.2
600.3
600.4
600.5
600.6
600.7
600.8
600.9	381	-460.6
601	322	-476.5
601.1	313	-475.6
601.2	313	-478
601.3	270	-467.1
601.4	238	-463.3
601.5	201	-465.9
601.6	181	-463.6
601.7	212	-472.2
601.8	283	-483.6
601.9	327	-486.7
602	288	-476.2
602.1	337	-472.2
602.2	223	-467.2
602.3	221	-469.4
602.4	297	-479.6
602.5	213	-472
602.6	224	-467.5
602.7	195	-465.1
602.8	317	-478.9
602.9	236	-476.5
603
603.1	210	-484.2
603.2	317	-468.1
603.3	303	-475.7
603.4	406	-478.3
603.5	358	-482.7
603.6	322	-474.6
603.7	340	-469
603.8	329	-472.1
603.9	405	-480.9
604	410	-483.5
604.1	344	-479.5
604.2	295	-472.7
604.3	376	-484.2
604.4	231	-475.5
604.5	237	-476.9
604.6	232	-473.2
604.7	252	-475.9
604.8	216	-473
604.9	282	-482.6
605	266	-476.2
605.1	337	-475.2
605.2	380	-483.2
605.3	365	-488.6
605.4		-480.6
605.5	404	-470
605.6	323	-468.3
605.7	297	-480.1
605.8	322	-474.7
605.9	330	-482.9
606	339	-479.7
606.1	232	-459.9
606.2	294	-466.8
606.3	265	-474.7
606.4	247	-476.6
606.5	260	-474.3
606.6	316	-479.1
606.7	286	-481.4
606.8	257	-487.9
606.9	237	-482.5
607	239	-467.5
607.1	252	-471.1
607.2	238	-469.6
607.3	202	-462.5
607.4	203	-474.3
607.5	304	-478.9
607.6	300	-475.5
607.7	296	-468.3
607.8	260	-468.2
607.9	315	-472.6
608	247	-478.6
608.1	227	-464.6
608.2	210	-467
608.3	338	-475.7
608.4	278	-473
608.5	379	-471.2
608.6	307	-475.4
608.7	310	-476.9
608.8	271	-472.1
608.9	251	-478.6
609	238	-472.1
609.1	320	-467.4
609.2	354	-469.3
609.3	266	-471.5
609.4
609.5	320	-474.7
609.6	240	-471.3
609.7	214	-458.9
609.8
609.9
610
610.1
610.2	253	-464.3
610.3	254	-468.8
610.4	184	-473.8
610.5	274	-466.3
610.6	227	-465.1
610.7	202	-457.6
610.8	251	-459.7
610.9	284	-472.2
611	285	-471.3
611.1	206	-467.4
611.2	296	-472.8
611.3	266	-471.4
611.4	362	-476.7
611.5	310	-470
611.6	269	-470.4
611.7	308	-475.3
611.8	328	-471.9
611.9	361	-474.2
612	353	-475.2
612.1	446	-475.7
612.2	398	-474.3
612.3	307	-474.1
612.4	365	-467.5
612.5	343	-467.1
612.6	307	-461.7
612.7	297	-465.3
612.8	356	-473
612.9	330	-470.6
613	381	-468.7
613.1	436	-476.1
613.2	416	-479.8
613.3	388	-472.8
613.4	268	-459.2
613.5	360	-466.1
613.6	372	-467.5
613.7	310	-471.4
613.8	323	-469.5
613.9	325	-470.2
614	291	-475.5
614.1	315	-482.8
614.2	272	-468.7
614.3	249	-471.6
614.4	312	-481.5
614.5	308	-480.8
614.6	294	-478.9
614.7	253	-473.5
614.8	237	-471.2
614.9	229	-476.7
615	239	-472.2
615.1	254	-468.8
615.2	285	-479.4
615.3	300	-466.9
615.4	291	-459.3
615.5	323	-468.8
615.6	365	-477.3
615.7	355	-476.8
615.8	302	-472.5
615.9	349	-474.7
616	262	-473.6
616.1
616.2
616.3
616.4	391	-479.6
616.5	382	-474.4
616.6	291	-478
616.7	334	-481.2
616.8	301	-478.3
616.9	309	-479.5
617	225	-478.5
617.1	282	-480.2
617.2	323	-476.6
617.3	356	-475.4
617.4	439	-481.3
617.5	347	-476.6
617.6	247	-470.9
617.7	282	-476.1
617.8	244	-478.1
617.9	239	-482.9
618	241	-475.5
618.1	243	-473.7
618.2	240	-478.2
618.3	239	-477.1
618.4	266	-478.6
618.5	272	-476.6
618.6	228	-472.4
618.7	247	-474.1
618.8	292	-477.4
618.9	279	-469.7
619	208	-457
