# Supplementary material for: An improved north–south synchronization of ice core records around the 41 kyr 10 Be peak
Source: Copernicus journal article supplement (doi:10.5194/cp-13-217-2017), 2017-03-10
Supplement: Supplementary file [file cp-13-217-2017-supplement-title-page.pdf › cp-13-217-2017-supplement-title-page.pdf]

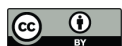

## *Supplement of*

# **An improved north–south synchronization of ice core records around the 41 kyr $^{10}\text{Be}$ peak**

**Grant M. Raisbeck et al.**

*Correspondence to:* Grant M. Raisbeck ([grant.raisbeck@csnsm.in2p3.fr](mailto:grant.raisbeck@csnsm.in2p3.fr))

- [cp-13-217-2017-supplement-title-page.pdf](#)
- [Data\\_Laschamp\\_CP.xlsx](#)

The copyright of individual parts of the supplement might differ from the CC-BY 3.0 licence.
